# Supplementary material for: Sustainable synthetic route for γ-Fe2O3/C hybrid as anode material for lithium-ion batteries
Source: Royal Society of Chemistry journal article supplement (doi:10.1039/c4dt03278k), 2014-11-26
Supplement: c4dt03278k1.pdf [file c4dt03278k1.pdf]

## Electronic Supplemental Information

### **Sustainable synthetic route for $\gamma$ -Fe<sub>2</sub>O<sub>3</sub>/C hybrid as anode material for lithium ion batteries**

Furong Qin<sup>1, a</sup>, Kai Zhang<sup>1, a</sup>, Liyuan Zhang<sup>1, a</sup>, Jie Li<sup>a</sup>, Hai Lu<sup>a</sup>, Yanqing Lai<sup>a</sup>, Zhian Zhang<sup>a</sup>,  
Yaming Zhou<sup>a</sup>, Yiwei Li<sup>a</sup>, Jing Fang<sup>\*a</sup>.

<sup>a</sup> School of Metallurgy and Environment, Central South University, Changsha 410083, China

---

<sup>1</sup> These authors contributed equally to this work.

\* Corresponding author: Tel: +86 731 88877683

Fax: +86 731 88710171.

E-mail address: fangjing526@csu.edu.cn (Jing Fang)

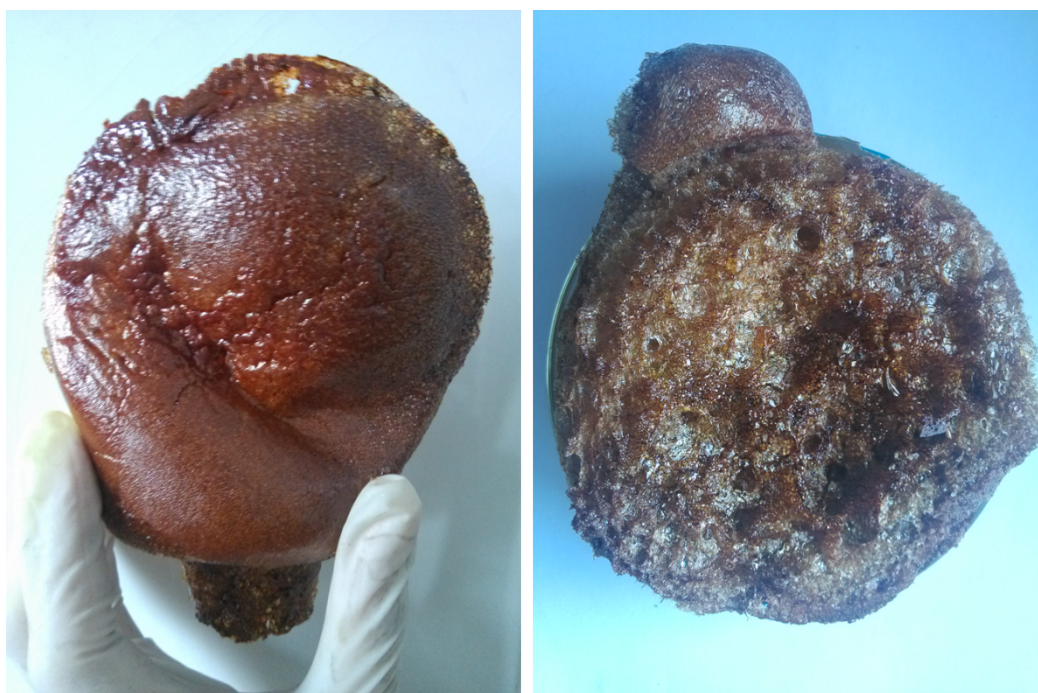

Figure S1. Digital images of the sponge-like dry gel.

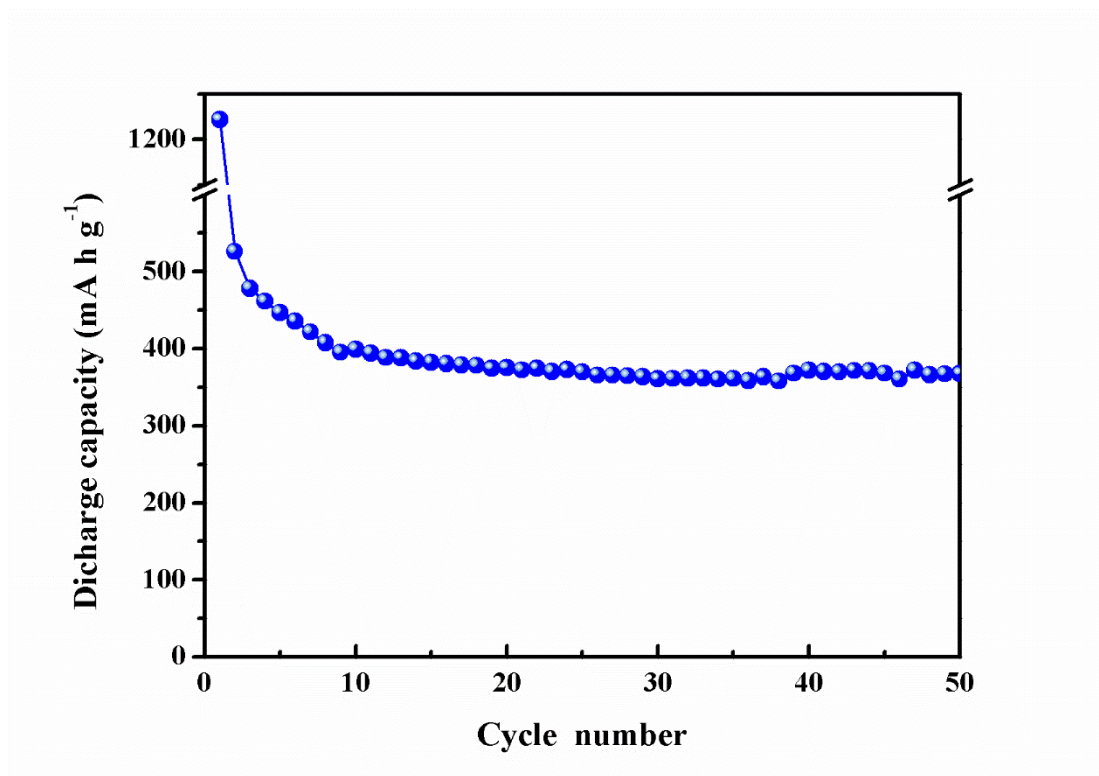

Figure S2. Cycle performance of the sample obtained from direct carbonization.

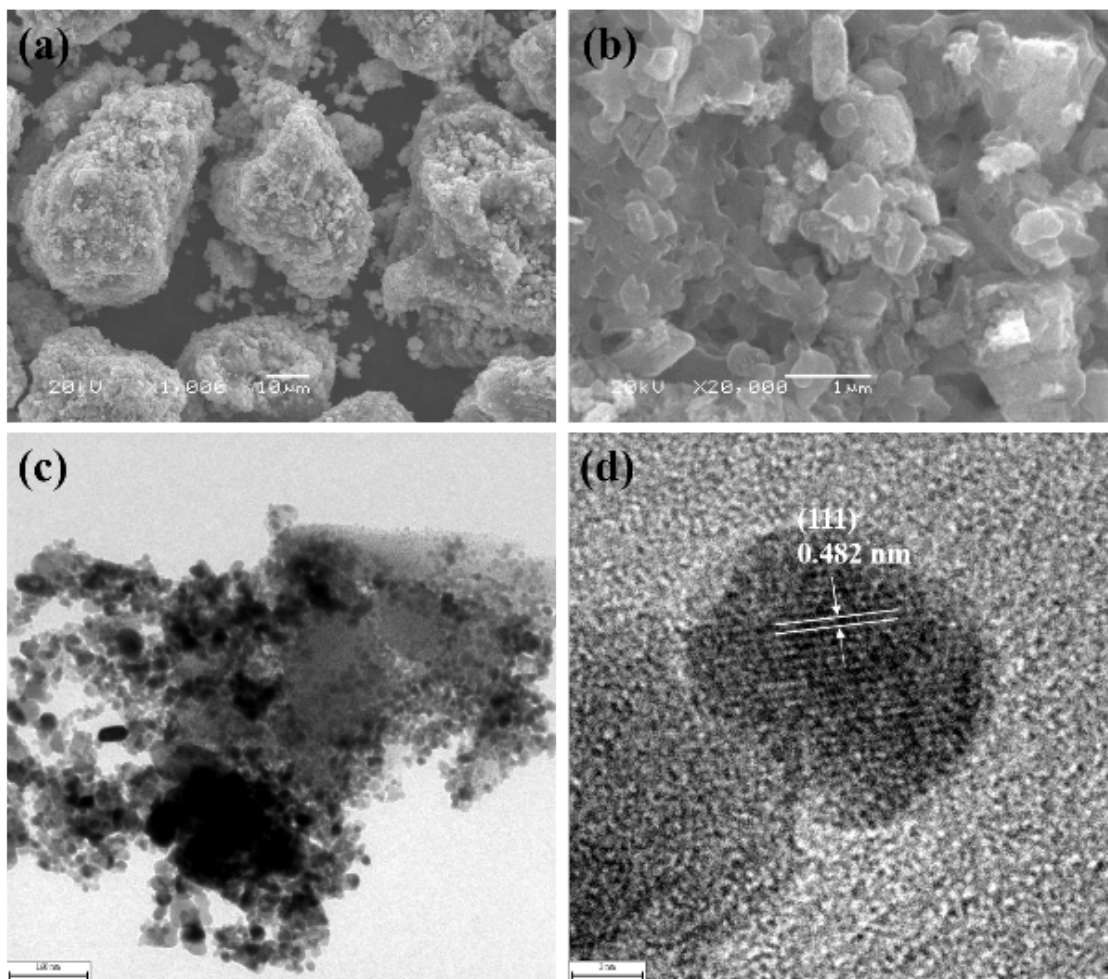

Figure S3 SEM (a,b) and TEM (c,d) images of FO/C-H at different magnification. The scale bars orderly represent 10  $\mu\text{m}$  (a), 1  $\mu\text{m}$  (b), 160 nm (c), 3 nm (d).

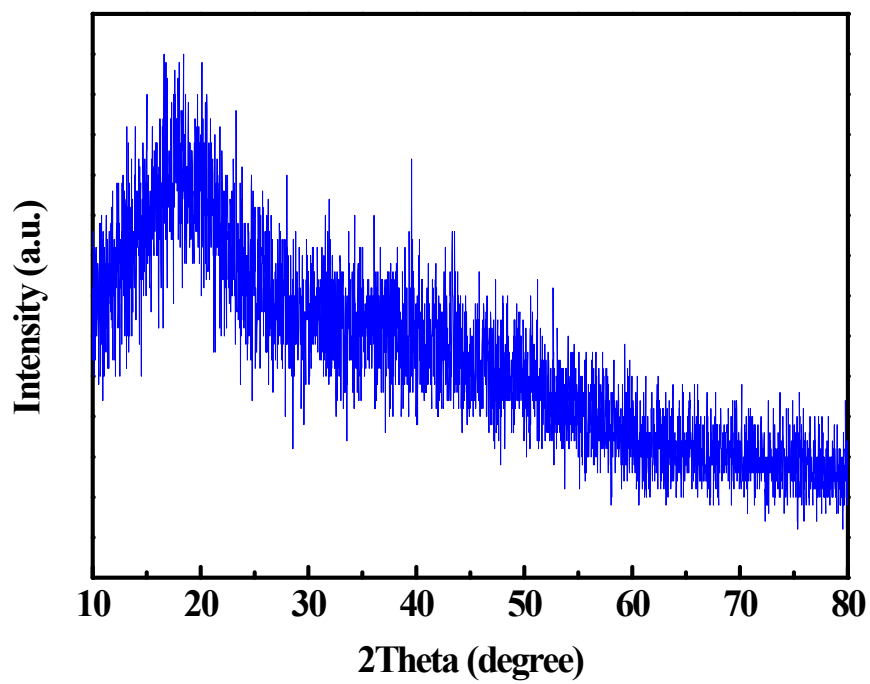

Figure S4. XRD pattern of the sponge-like dry gel.

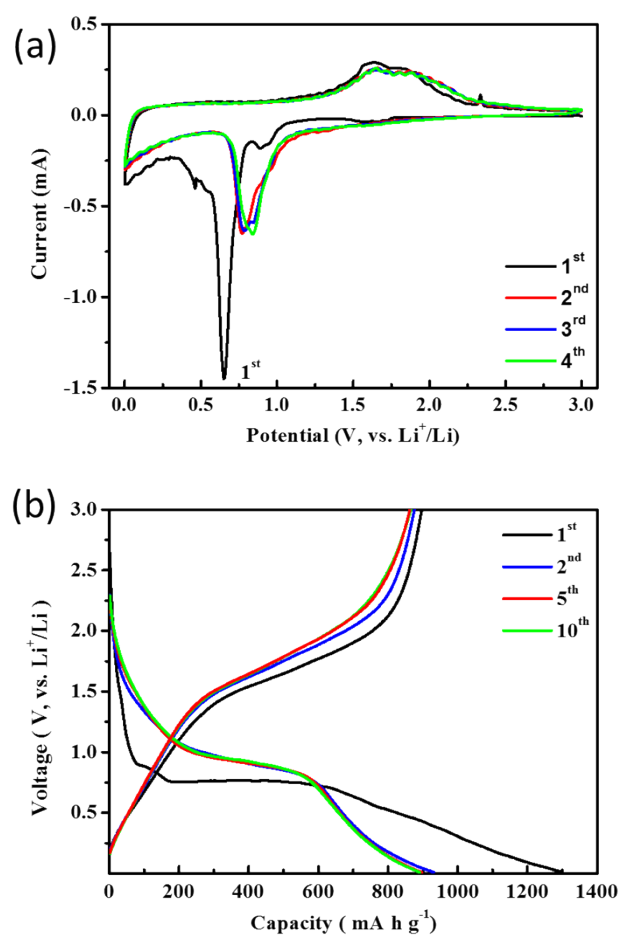

Figure S5 CV curves (a) and charge-discharge profiles (b) at 0.5 A g<sup>-1</sup> of FO/C-H.

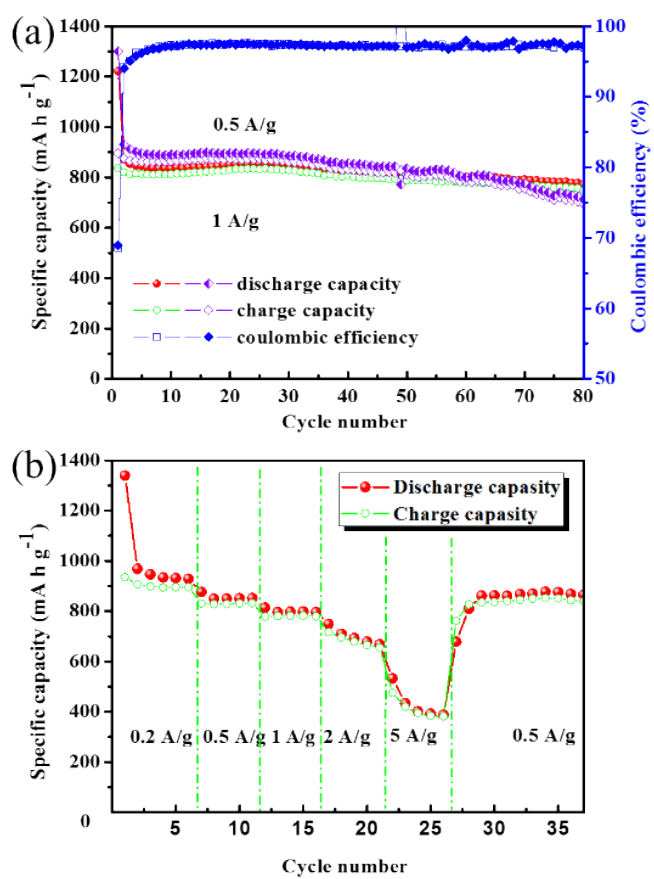

Figure S6 Cycle (a) and rate (b) performance of FO/C-H.

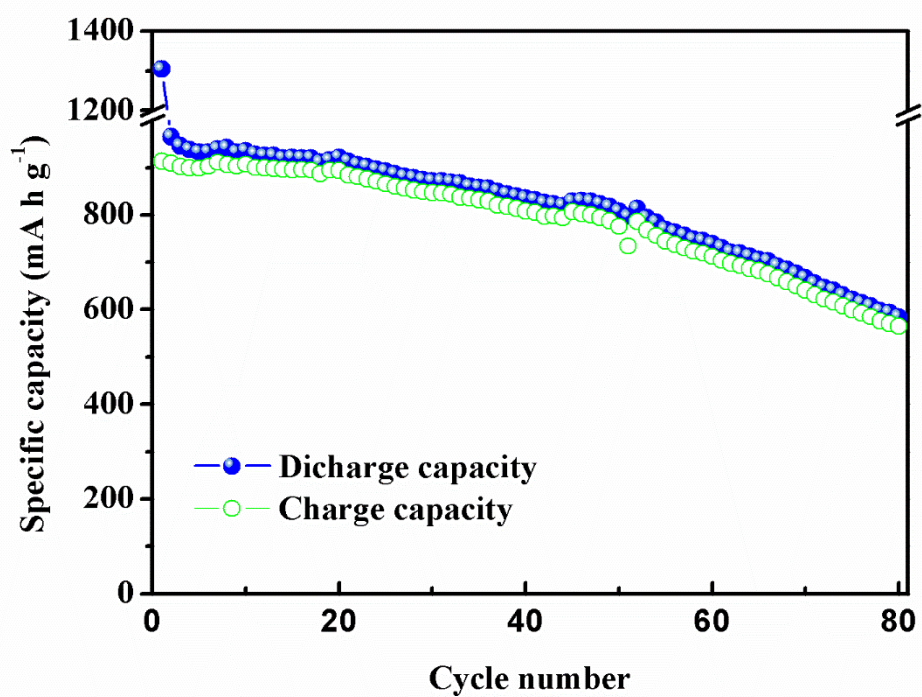

Figure S7. Cycle performance ( $1\text{ A g}^{-1}$ ) of the  $\gamma\text{-Fe}_2\text{O}_3/\text{C}$  hybrid with higher  $\text{Fe}_2\text{O}_3$  content, which is obtained from  $27\text{ g Fe(NO}_3)_3 \cdot 9\text{H}_2\text{O}$  and  $10\text{ g starch}$ .
